# Significant Production of Ozone from Germicidal UV Lights at 222 nm

Zhe Peng,<sup>1,2</sup> Douglas A. Day,<sup>1,2</sup> Guy Symonds,<sup>1,2</sup> Olivia Jenks,<sup>1,2</sup> Harald Stark,<sup>1,2,3</sup> Anne V. Handschy,<sup>1,2</sup> Joost de Gouw,<sup>1,2</sup> and Jose L. Jimenez<sup>1,2</sup>

1: Dept. of Chemistry, University of Colorado, Boulder, CO, USA

2: Cooperative Institute for Research in Environmental Sciences (CIRES), University of Colorado, Boulder, CO, USA

3: Aerodyne Research, Billerica, MA, USA

## Abstract

Lamps emitting at 222 nm have attracted recent interest for germicidal ultraviolet disinfection (“GUV222”). Their impact on indoor air quality is considered negligible. In this study, ozone formation is observed for eight different lamps from five manufacturers, in amounts an order-of-magnitude larger than previous reports. Most lamps produce O<sub>3</sub> in amounts close to the first-principles calculation, with e.g. a generation rate of 22 ppb h<sup>-1</sup> for Ushio B1 modules in a 21 m<sup>3</sup> chamber. Much more O<sub>3</sub> is produced by lamps when optical filters were removed for tests, and by an undesired internal electrical discharge. A test in an office shows an increase of ~6.5 ppb during lamp-on periods, consistent with a simple model with the O<sub>3</sub> generation rate, ventilation and O<sub>3</sub> losses. We demonstrate the use of a photolytic tracer to quantify the averaged GUV222 fluence rate in a room. Low-cost electrochemical O<sub>3</sub> sensors were not useful below 100 ppb. Formation of O<sub>3</sub> increases indoor particulate matter (PM), which is ~10-30 times more deadly than O<sub>3</sub> per unit mass, and which is ignored when only considering O<sub>3</sub> threshold limit values. To limit GUV222-created indoor pollution, lower fluence rates should be used if possible, especially under low-ventilation conditions.

TOC graphic:

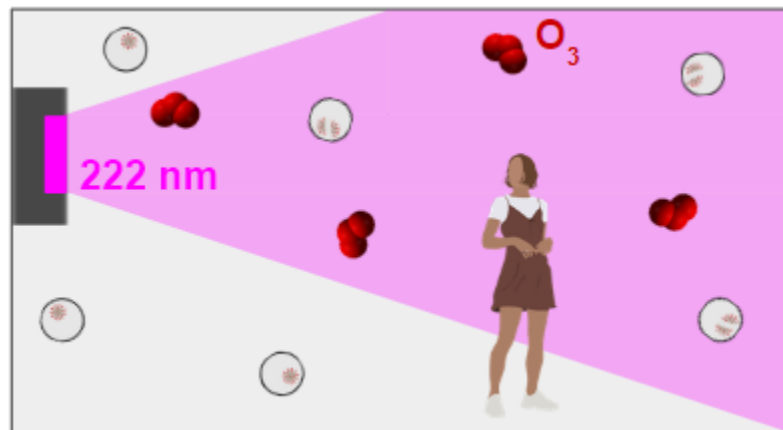

## 1. Introduction

Germicidal ultraviolet (GUV) disinfection has been used for a century to inactivate airborne pathogens, i.e. those that infect via inhalation of pathogen-containing aerosols that float in the air.<sup>1–3</sup> Despite some early interest in widespread deployment (e.g. a campaign from Westinghouse to install GUV lamps in every American home<sup>4</sup>), it has remained mostly a niche technique in medical circles, in particular to reduce tuberculosis transmission.<sup>5</sup> Research during the COVID-19 pandemic led to the conclusion that airborne transmission is dominant for this virus,<sup>6</sup> and also important for other respiratory viruses.<sup>7</sup> This has resulted in intense interest in methods to remove pathogens from the air, including ventilation, filtration, and air disinfection, in particular by GUV.<sup>8</sup>

GUV uses lamps that emit light in the UVC range (200–280 nm) to irradiate indoor air, which can inactivate aerosol-bound pathogens. It has traditionally been performed using filtered mercury lamps whose most intense emission is at 254 nm (“GUV254”). More recently the use of shorter wavelengths (“far UVC”, 200–230 nm) has gained in popularity, in particular using KrCl excimer with peak emission of 222 nm (“GUV222”). Extensive scientific reference information on GUV has been compiled at the online GUV Cheat Sheet.<sup>9</sup>

UVC lamps with wavelengths below 242 nm can generate O<sub>3</sub>,<sup>10</sup> a dangerous pollutant. A recent review concluded that O<sub>3</sub> generation by KrCl lamps was minimal: for example a 12 W lamp was estimated to take 267 h to produce 4.5 ppb O<sub>3</sub> in a 30 m<sup>3</sup> room in the absence of losses.<sup>11</sup> A recent modeling paper estimated O<sub>3</sub> generation to be nearly two orders-of-magnitude faster,<sup>12</sup> but those findings have not been confirmed experimentally. There is also discussion in the literature whether O<sub>3</sub> is mainly formed by the UVC radiation or by discharges in electrical connections.<sup>11</sup>

In addition, it is typically difficult to quantify the GUV fluence rate that the air experiences in a room or chamber, since lamp emission results in inhomogeneous light spatial distributions, the reflectivity of materials at the GUV wavelengths varies widely, and due to continuous and highly variable air motion. Measurements in different points of a room to quantify the average, or computer modeling can be performed but are time consuming. Quantification of the radiation field with measurements of inactivation of viruses or bacteria require culture assays which are slow and very costly.

Here we present direct measurements of O<sub>3</sub> production from KrCl excimer lamps in a laboratory chamber and compare them with literature estimates. A chemical tracer that allows quantification of GUV fluence rate is introduced. Measurements are also performed in an office. Significant O<sub>3</sub> production is observed in both controlled-laboratory and real-world settings.

## 2. Methods

### *Demonstration of tracers for GUV exposure of air*

In this work, we use  $\text{CBr}_4$  as a chemical tracer of GUV exposure. We show that it has relatively fast decay under 222 nm irradiation and can be detected by commonly-available Proton-Transfer-Reaction Mass Spectrometers with high sensitivity. It does not react with common atmospheric oxidants such as  $\text{O}_3$ , OH, or  $\text{NO}_3$  at typical indoor air concentrations. It has high vapor pressure and low water solubility which minimizes partitioning to room surfaces and tubing.<sup>13,14</sup> More details can be found in Section S1.

### **Laboratory chamber experiments**

A well-characterized environmental chemical reaction chamber was used to measure the  $\text{O}_3$  production rate and  $\text{CBr}_4$  tracer decay for individual GUV fixtures. A  $\sim 21 \text{ m}^3$  Teflon reaction chamber (approximately 3x3x2 meters, LxWxH) is constructed of 50  $\mu\text{m}$  thick FEP Teflon film (ATEC, Malibu, California). Temperature during the experiments was  $\sim 20\text{-}25^\circ\text{C}$ , and the built-in chamber UVA / visible lights were not used other than at occasional low-levels of visible lights for task lighting. The chamber systems are described in previous publications exploring chemical and physical processes of gases and aerosols.<sup>15,16</sup> The GUV light source was placed either a few cm outside the chamber (at one corner shining into the bag and diagonally across to the opposite corner at mid-height) or placed within the chamber (at a lower corner mounted on a ring stand facing the opposite upper corner) (Fig. S1).

A typical experiment was conducted as follows. Prior to each experiment, the chamber was flushed for several hours with 400 LPM clean air ( $\text{NO}_x < 0.2 \text{ ppb}$ ;  $\text{VOC} < 50 \text{ ppb}$ ) from an AADCO generator (Model 737-15A) (at slightly positive pressure, 1-2 Pa) and then topped off to consistently reach the full volume ( $\sim 21 \text{ m}^3$ ) by filling until the differential pressure reached 3.5 Pa. The GUV lamp was then turned on either continuously (Fig. 1b) or on/off in steps (e.g., 120 minutes on, 45 minutes off, Fig. 1a) for several hours.  $\text{O}_3$  formation was measured with a Thermo Scientific 49i  $\text{O}_3$  Analyzer. Later in the experiments while the GUV lamp was off, several ppb of  $\text{CBr}_4$  were added by placing the solid compound within a glass bulb and gently heating with a heat gun while flowing UHP nitrogen gas (for  $\sim 2$  minutes), and then mixing for 1 minute with a Teflon-coated mixing fan (integrated in the chamber). The on/off operation allowed to unequivocally attribute changes in the  $\text{O}_3$  and  $\text{CBr}_4$  mixing ratios to the GUV illumination, and to quantify any other losses separately.  $\text{CBr}_4$  was measured with Vocus (detected as  $\text{CBr}_3^+$ ), which was calibrated by adding a known quantity to the chamber.<sup>17</sup> See Sections S2 and S3 for more information on calibrations of the  $\text{O}_3$  analyzers and Vocus.

Since a single lamp fixture was illuminating from one corner of the bag, the fluence rate is not constant within the bag volume. However, on the timescales of the experiments (relative to the production/decay of the measured compounds), the air within the chamber is relatively well mixed. This is due to the continuous mixing that occurs in the absence of mechanical mixing, with a timescale of  $\sim 10$  minutes.<sup>16</sup> This is apparent in the stepwise lamp illumination experiments, by the relatively quick stabilization of  $\text{CBr}_4$  and  $\text{O}_3$  when the light is turned off (Fig. 1a).

120 *Table 1. KrCl excimer lamps tested in the chamber experiments and key results. Also shown are the results of first-principles*  
 121 *calculations with different lamp spectra.*  
 122

| Manufa<br>cturer | Model          | Spectrum or Lamp                                                                                        | Inside or<br>Outside<br>Teflon<br>Bag? | Filtered?                | Electrical<br>power<br>(W) | O <sub>3</sub><br>generation<br>rate (ppb h <sup>-1</sup> ) | CBr <sub>4</sub><br>photolysis<br>rate (h <sup>-1</sup> ) | Ratio between<br>the 2 rates<br>(ppb) | O <sub>3</sub> generated<br>per unit power<br>μg h <sup>-1</sup> W <sup>-1</sup> | Effective<br>fluence rate<br>(μW cm <sup>-2</sup> s <sup>-1</sup> ) |
|------------------|----------------|---------------------------------------------------------------------------------------------------------|----------------------------------------|--------------------------|----------------------------|-------------------------------------------------------------|-----------------------------------------------------------|---------------------------------------|----------------------------------------------------------------------------------|---------------------------------------------------------------------|
| N/A              |                | Theoretical<br>calculation w/<br>narrow emission<br>line at 222 nm <sup>a</sup>                         |                                        |                          |                            | 14                                                          | 0.11                                                      | 130                                   |                                                                                  | 2.1                                                                 |
| N/A              |                | Theoretical calc. w/<br>Ushio B1 (NIST-<br>measured<br>spectrum) <sup>a</sup>                           |                                        |                          |                            | 22                                                          | 0.097                                                     | 230                                   |                                                                                  | 2.1                                                                 |
| N/A              |                | Theoretical calc. w/<br>Ushio B1 (NIST<br>spectrum, adding<br>an estimated 190<br>nm band) <sup>b</sup> |                                        |                          |                            | 88                                                          | 0.097                                                     | 910                                   |                                                                                  | 2.2                                                                 |
| Far UV           | Krypton<br>-36 | Ushio B1                                                                                                | Inside                                 | Yes                      | 15                         | 21                                                          | 0.093                                                     | 230                                   | 48                                                                               | 2.0                                                                 |
| Far UV           | Krypton<br>-36 | Ushio B1                                                                                                | Inside                                 | No -<br>removed<br>by us | 15                         | 100                                                         | 0.21                                                      | 490                                   | 230                                                                              | 4.6                                                                 |
| Far UV           | Krypton<br>-36 | Ushio B1                                                                                                | Outside                                | No -<br>removed<br>by us |                            | 66                                                          |                                                           |                                       |                                                                                  |                                                                     |
| Custom           | N/A            | Ushio B1                                                                                                | Inside                                 | Yes                      | 16                         | 23                                                          | 0.10                                                      | 230                                   | 49                                                                               | 2.2                                                                 |
| Custom           | N/A            | Ushio B1.5 (with<br>diffuser)                                                                           | Inside                                 | Yes                      | 11                         | 8.5                                                         | 0.051                                                     | 170                                   | 26                                                                               | 1.1                                                                 |

|                            |                             |                               |         |                    |    |      |        |      |     |      |
|----------------------------|-----------------------------|-------------------------------|---------|--------------------|----|------|--------|------|-----|------|
| Naomi Wu, China            | N/A                         | GMV FAR-UVC 15 W              | Inside  | Yes                | 15 | 11   | 0.039  | 280  | 25  | 0.84 |
| Naomi Wu, China (portable) | N/A                         | FIRST UVC HEXAGON - USB       | Inside  | Yes                | 5  | 2.0  | 0.0095 | 210  | 7   | 0.21 |
| ERGO HealthTech            | X One                       | Not known                     | Inside  | Yes                | 5  | 2.0  | 0.0081 | 250  | 13  | 0.18 |
| Eden Park (A)              | MobileShield <sup>222</sup> | Eden Park Microplasma Far-UVC | Inside  | Yes                | 9  | 30   | 0.030  | 1000 | 110 | 0.65 |
| Eden Park (A)              | MobileShield <sup>222</sup> | Eden Park Microplasma Far-UVC | Inside  | No - removed by us | 9  | 70   | 0.040  | 1800 | 260 | 0.86 |
| Eden Park (A)              | MobileShield <sup>222</sup> | Eden Park Microplasma Far-UVC | Outside | No - removed by us |    | 0.51 |        |      |     |      |
| Eden Park (B)              | MobileShield <sup>222</sup> | Eden Park Microplasma Far-UVC | Inside  | Yes                | 9  | 1.3  | 0.010  | 120  | 4.6 | 0.22 |
| Eden Park (B)              | MobileShield <sup>222</sup> | Eden Park Microplasma Far-UVC | Inside  | No - removed by us | 9  | 14   | 0.039  | 360  | 52  | 0.84 |

123 <sup>a</sup> hypothetical case with a total UV intensity of  $2.3 \times 10^{12}$  photons  $\text{cm}^{-2} \text{s}^{-1}$

124 <sup>b</sup> hypothetical case with the same 222 nm band as the NIST-measured Ushio B1 spectrum and an artificial 190 nm band, constructed from the

125 spectrum shown in ref.<sup>11</sup> (Fig. S2)

## Office experiments

Experiments were also performed in a small university office, which measured 4.0x2.7x3.1 m (LxWxH; vol. ~33 m<sup>3</sup>). It has an entrance door and two windows. A supply and a return vent are located near the ceiling. To simulate a low-ventilation situation, the windows, gaps around utility penetrations, and supply / return vents were sealed with plastic sheeting or tape (Fig. S3).

The ventilation rate was quantified by monitoring the decay of CO<sub>2</sub> after an injection (from a compressed gas cylinder) with an Aranet4 sensor (SAFTehnika, Latvia). A fan was turned on remotely for a few seconds after CO<sub>2</sub> injection to ensure homogeneity within the room. The ventilation / infiltration rate was estimated with an exponential fit to the CO<sub>2</sub> decay to be as low as ~0.44 h<sup>-1</sup> (timescale of ~2.3 h, comparable to typical residences),<sup>18</sup> but with some experiment-to-experiment variability. For this reason CO<sub>2</sub> was injected also during the O<sub>3</sub> decay or production experiments.

To quantify the O<sub>3</sub> decay to surfaces and to gas and aerosol chemistry in the room, the O<sub>3</sub> decay in the room was measured with a 2B 205 analyzer. The decay was fit to an exponential, and the O<sub>3</sub> deposition rate coefficient was determined by subtracting the ventilation rate coefficient (Fig. S4).

## 3. Results

### Theoretical estimation of O<sub>3</sub> production and tracer decay

In this study, we tested lamps from different manufacturers (Table 1). The emission spectrum of the Ushio B1 lamp that is used by multiple lamp manufacturers is available from NIST (Fig. S2). The absorption spectra of O<sub>2</sub> and CBr<sub>4</sub> are well-known.<sup>10,19</sup> Their expected photolysis rates under the Ushio B1 lamp irradiation can be calculated by integrating the product of UV fluence rate and absorption cross sections of O<sub>2</sub> or CBr<sub>4</sub> over the wavelengths of interest. As 2 molecules of O<sub>3</sub> are produced per O<sub>2</sub> molecule photolyzed, the theoretical O<sub>3</sub> production rate for the Ushio B1 lamp at a total UV fluence rate of 2.3x10<sup>12</sup> photons cm<sup>-2</sup> s<sup>-1</sup> is ~22 ppb h<sup>-1</sup>. At the same UV intensity, the theoretical CBr<sub>4</sub> photolysis rate is 0.097 h<sup>-1</sup>. The ratio between them (P<sub>O<sub>3</sub></sub>/J<sub>CBr<sub>4</sub></sub> ~ 230 ppb), i.e. O<sub>3</sub> production through O<sub>2</sub> photolysis over a period for an e-fold decay of CBr<sub>4</sub>, is independent of UV fluence rate and is characteristic of a specific GUV222 lamp.

When unfiltered optically, the emission of KrCl excimer lamp also includes a band centered at 190 nm (Fig. S2).<sup>11</sup> If this band is added to the theoretical calculation (as a proxy of unfiltered lamps), the O<sub>3</sub> generation rate is increased by a factor of ~4. Although the 190 nm band has much lower intensity, the absorption cross section of O<sub>2</sub> is on average ~2 orders of magnitude larger for the 190 nm band than for the 222 nm one. However, this band has little impact on CBr<sub>4</sub> as its cross section below 200 nm is much lower. This results in a higher P<sub>O<sub>3</sub></sub>/J<sub>CBr<sub>4</sub></sub> ratio (~900 ppb) than for the filtered lamp spectrum.

### O<sub>3</sub> production and CBr<sub>4</sub> in the chamber

Results of a typical chamber experiment (Ushio B1) are shown in Fig. 1a.  $O_3$  increases approximately linearly with time when the lamp is on. When this lamp is on for an extended period (days),  $O_3$  in the chamber can reach ppm levels (Fig. S5). At very high  $O_3$  concentrations, the small loss rate coefficient of  $O_3$  (mainly due to  $O_3$  photolysis by the 222 nm band, Fig. S6) slightly reduces the rate of  $O_3$  increase. An Ushio B1 lamp generates ~22 ppb  $O_3$  per h, very close to the theoretical case shown above. The effective UVC fluence rate inferred from the  $CBR_4$  photolytic decay rate ( $\sim 0.1 \text{ h}^{-1}$ , dilution corrected, Table 1) (Fig. 1b), is also very close to the theoretical case value.  $P_{O_3}/J_{CBR_4}$ , a characteristic of the lamp, is almost the same as the theoretical case value (Table 1).

The other devices tested in this study, with electrical power ranging from ~5 W (portable device) to ~15 W, also have  $P_{O_3}/J_{CBR_4}$  values in the range of 200-300 ppb, indicating similar spectral characteristics of their emissions. The exceptions are the lamps whose filters were removed for our tests, two Eden Park lamps we tested, and an Ushio B1.5 lamp with a diffuser.

The Far UV device with filter removed has 4 times more  $O_3$  production and >100% larger  $CBR_4$  decay than when it has the filter, leading to about twice  $P_{O_3}/J_{CBR_4}$  of the device with the filter. Without the filter, more photons of the 222 nm band are allowed out of the device, leading to faster  $CBR_4$  decay. The 190 nm band is also unfiltered, producing much more  $O_3$  than the 222 nm band of the device without filter can produce.

The Eden Park lamp has almost the same emission spectrum as the Ushio B1 (Fig. S7). With its filter, the first Eden Park device tested (EP-A, Table 1) results in ~1/3  $CBR_4$  decay vs. Ushio B1, while producing more  $O_3$ . Most of this unexpectedly high  $O_3$  production appears to be due to electrical discharge within the electrical components of the device (but outside the lamp). We arrive at this conclusion after additional tests: (i) low  $O_3$  production by the EP-A in the chamber bag when located outside the bag, in contrast to the Ushio B1 module (Table 1). (ii) For  $O_3$  measurement just outside the EP-A housing, but not in front of the light, the  $O_3$  monitor detects ppm-level  $O_3$  (Fig. S8), implying very strong non-photochemical  $O_3$  production inside the device.

In contrast, the other Eden Park device test (EP-B) did not produce an excessive amount of  $O_3$  in its housing, implying no undesired electrical discharge there. It also only produces 1.3 and 14 ppb  $O_3$  per h in the chamber with and without its filter, respectively, resulting in significantly lower  $P_{O_3}/J_{CBR_4}$  than the Ushio B1 lamps. The reasons for the lower  $P_{O_3}/J_{CBR_4}$  of the Ushio B1.5 module and EP-B lamp are unclear, as they have similar emission spectra to Ushio B1 (Fig. S7).



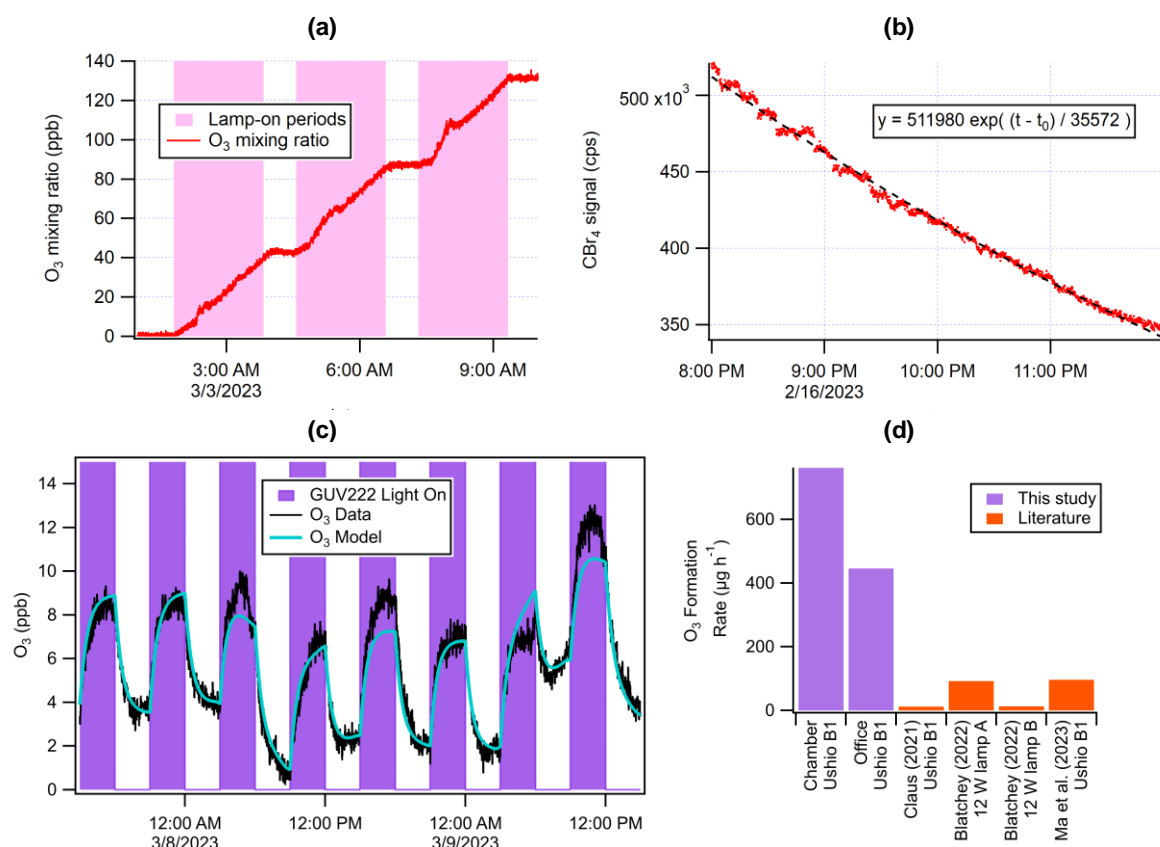

Figure 1. Time series of (a) O<sub>3</sub> and (b) CBr<sub>4</sub> during chamber experiments with the 12 W Far UV lamp (Ushio B1 module). (c) Time series of O<sub>3</sub> in the office experiments, along with model results. (d) Comparison of O<sub>3</sub> formation rates in this study with previous literature.

### O<sub>3</sub> mass balance in an office

The Far UV lamp was repeatedly cycled on (3 h) and off (3 h) together with periodic CO<sub>2</sub> injections (Fig. 1c and Fig. S9). O<sub>3</sub> rapidly rose once the lamp was turned on and reached an approximate steady state (8-14 ppb, typically increasing ~6.5 ppb). After turning off the lamp, O<sub>3</sub> rapidly decreased, also quickly reaching a steady state. Background O<sub>3</sub> in the office, as indicated by the steady-state O<sub>3</sub> level at the end of lamp-off periods, varied by ~4 ppb during the experiment. It is affected by ventilation rate, deposition, as well as O<sub>3</sub> in outdoor/adjacent-room air infiltrating into the office. Ventilation rates ranged 0.62-0.96 h<sup>-1</sup> (Fig. S9). O<sub>3</sub> deposition rates were more variable (range 0.5-2.3 h<sup>-1</sup>, average 0.78 h<sup>-1</sup>, Fig. S9).

O<sub>3</sub> in the office was modeled with a chemical-kinetics simulator.<sup>20</sup> The model was constrained by the measured O<sub>3</sub> and CO<sub>2</sub> concentrations and decays (Section S4). The measured and modeled O<sub>3</sub> are in good agreement (Fig. 1c). The O<sub>3</sub> production rate of the Ushio B1 module in the office (Fig. S3) is estimated to be 8.6 ppb/h from the constrained model. This is ~39% of the value measured in the chamber, which is explained by the larger volume of the office (~32.9 vs. ~20.6 m<sup>3</sup>) and the shorter effective UV pathlength (~3.2 vs. ~4.5 m). Scaling results in a difference of 12%, thus showing agreement well within experimental uncertainties (Fig. S10).



## Implications

Significant amounts of O<sub>3</sub> can be produced by GUV-222 lamps in both controlled-laboratory and real-world settings. Our results of 762 µg h<sup>-1</sup> for a 21 m<sup>3</sup> chamber and 446 µg h<sup>-1</sup> for an office with a shorter light path are summarized in Fig. 1d. Note that these results would be ~18% higher at sea level due to the reduced ambient pressure in Boulder. For comparison, previous reports for the same GUV222 module (or modules using the same electrical power) from the literature of 12,<sup>11</sup> 13 and 92,<sup>21</sup> and 96 µg h<sup>-1</sup><sup>22</sup> are also shown. These had been used to conclude that O<sub>3</sub> generation from GUV222 is not a concern. On average, our results are an order of magnitude larger than the literature. The discrepancy may arise because most prior measurements were performed in small boxes, with very short optical pathlengths and high surface/volume ratios that are not representative of real room applications. The former may lead to smaller O<sub>3</sub> production rate, and the latter to substantial losses to the box surfaces, which were not accounted for. Moreover, some of these measurements may have been made with low-cost electrochemical O<sub>3</sub> sensors. We tested four sensors and found them to be unresponsive to O<sub>3</sub> mixing ratios below 200 ppb, therefore such sensors are not useful for this problem (Section S5).

O<sub>3</sub> itself is a major air pollutant with excess deaths observed at levels below those in occupational guidelines of 50-100 ppb.<sup>23,24</sup> Critically, it can also lead to formation of other pollutants including particulate matter,<sup>12</sup> which has ~10-30 times higher excess death impacts on a mass basis (Section S6).<sup>23,25</sup> O<sub>3</sub> production by GUV222 lamps thus can be a major concern, at least under low-ventilation conditions.

Our experiments have an average fluence rate of ~2.1 µW cm<sup>-2</sup> s<sup>-1</sup>, about 1/3 of the recently-updated ACGIH eye limit, and approximately consistent with a room installation that achieves the ACGIH limit at eye level (H. Claus, pers. comm.). ACGIH should consider reduced limits at low ventilation rates. Current literature estimates of the GUV222 disinfection rate coefficient for SARS-CoV-2 span a factor of 33.<sup>26,27</sup> Future research should focus on narrowing down this range, which may allow high efficacy of GUV222 at lower fluences, thus reducing impacts on indoor air.

## Acknowledgements

We thank the Balvi Filantropic Fund, the CIRES Innovative Research Program, and the Sloan Foundation (grant 2019-12444) for support of this work. We thank Shelly Miller, Kenneth Wood, Ewan Eadie, Catherine Noakes, Dustin Poppendieck, Michael Link, Mikael Ehn, Jesse Kroll, Victoria Barber, John Balmes, and the larger GUV scientific and technical communities for useful discussions. We are grateful to Holger Claus, Aaron Collins, Matthew Pang, Kristina Chang, Scott Diddams and Naomi Wu for sharing data or materials and useful discussions.

## References

- (1) Wells, W. F. Air Disinfection in Day Schools. *Am. J. Public Health Nations. Health* **1943**, 33 (12), 1436–1443.
- (2) Riley, R. L.; Mills, C. C.; O'grady, F.; Sultan, L. U.; Wittstadt, F.; Shivpuri, D. N. Infectiousness of Air from a Tuberculosis Ward. Ultraviolet Irradiation of Infected Air: Comparative Infectiousness of Different Patients. *Am. Rev. Respir. Dis.* **1962**, 85, 511–525.
- (3) Nardell, E. A. Air Disinfection for Airborne Infection Control with a Focus on COVID-19: Why Germicidal UV Is Essential†. *Photochem. Photobiol.* **2021**, 97 (3), 493–497.
- (4) Fitzgerald, G. *The Origins of Aerobiology and Airborne Disease Research in the United States, 1930-1955*. Intervals Podcast of the Organization of American Historians. <https://rebrand.ly/m0uxwym>.
- (5) Mphaphlele, M.; Dharmadhikari, A. S.; Jensen, P. A.; Rudnick, S. N.; van Reenen, T. H.; Pagano, M. A.; Leuschner, W.; Sears, T. A.; Milonova, S. P.; van der Walt, M.; Stoltz, A. C.; Weyer, K.; Nardell, E. A. Institutional Tuberculosis Transmission. Controlled Trial of Upper Room Ultraviolet Air Disinfection: A Basis for New Dosing Guidelines. *Am. J. Respir. Crit. Care Med.* **2015**, 192 (4), 477–484.
- (6) Greenhalgh, T.; Jimenez, J. L.; Prather, K. A.; Tufekci, Z.; Fisman, D.; Schooley, R. Ten Scientific Reasons in Support of Airborne Transmission of SARS-CoV-2. *Lancet* **2021**, 397, 1603–1605.
- (7) Wang, C. C.; Prather, K. A.; Sznitman, J.; Jimenez, J. L.; Lakdawala, S. S.; Tufekci, Z.; Marr, L. C. Airborne Transmission of Respiratory Viruses. *Science* **2021**, 373 (6558), eabd9149.
- (8) Morawska, L.; Tang, J. W.; Bahnfleth, W.; Bluyssen, P. M.; Boerstra, A.; Buonanno, G.; Cao, J.; Dancer, S.; Floto, A.; Franchimon, F.; Haworth, C.; Hogeling, J.; Isaxon, C.; Jimenez, J. L.; Kurnitski, J.; Li, Y.; Loomans, M.; Marks, G.; Marr, L. C.; Mazzearella, L.; Melikov, A. K.; Miller, S.; Milton, D. K.; Nazaroff, W.; Nielsen, P. V.; Noakes, C.; Peccia, J.; Querol, X.; Sekhar, C.; Seppänen, O.; Tanabe, S.-I.; Tellier, R.; Tham, K. W.; Wargocki, P.; Wierzbicka, A.; Yao, M. How Can Airborne Transmission of COVID-19 Indoors Be Minimised? *Environ. Int.* **2020**, 142, 105832.
- (9) Jimenez, J. L. *GUV Cheat Sheet*. <http://bit.ly/guv-cheat>.
- (10) J. B. Burkholder, S. P. Sander, J. Abbatt, J. R. Barker, C. Cappa, J. D. Crounse, T. S. Dibble, R. E. Huie, C. E. Kolb, M. J. Kurylo, V. L. Orkin, C. J. Percival, D. M. Wilmouth, and P. H. Wine. *Chemical Kinetics and Photochemical Data for Use in Atmospheric Studies*; JPL Publication 19-5; Jet Propulsion Laboratory, Pasadena, 2019.
- (11) Claus, H. Ozone Generation by Ultraviolet Lamps†. *Photochem. Photobiol.* **2021**, 97 (3), 471–476.
- (12) Peng, Z.; Miller, S. L.; Jimenez, J. L. Model Evaluation of Secondary Chemistry due to Disinfection of Indoor Air with Germicidal Ultraviolet Lamps. *Environ. Sci. Technol. Lett.* **2023**, 10 (1), 6–13.
- (13) Pagonis, D.; Price, D. J.; Algrim, L. B.; Day, D. A.; Handschy, A. V.; Stark, H.; Miller, S. L.; de Gouw, J.; Jimenez, J. L.; Ziemann, P. J. Time-Resolved Measurements of Indoor Chemical Emissions, Deposition, and Reactions in a University Art Museum. *Environ. Sci. Technol.* **2019**, 53 (9), 4794–4802.
- (14) Liu, X.; Deming, B.; Pagonis, D.; Day, D. A.; Palm, B. B.; Talukdar, R.; Roberts, J. M.; Veres, P. R.; Krechmer, J. E.; Thornton, J. A.; de Gouw, J. A.; Ziemann, P. J.; Jimenez, J. L. Effects of Gas–wall Interactions on Measurements of Semivolatile Compounds and Small Polar Molecules. *Atmos. Meas. Tech.* **2019**, 12 (6), 3137–3149.
- (15) Liu, X.; Day, D. A.; Krechmer, J. E.; Brown, W.; Peng, Z.; Ziemann, P. J.; Jimenez, J. L. Direct Measurements of Semi-Volatile Organic Compound Dynamics Show near-Unity Mass Accommodation Coefficients for Diverse Aerosols. *Commun. Chem.* **2019**, 2 (98), 1–

- 9.
- (16) Krechmer, J. E.; Day, D. A.; Ziemann, P. J.; Jimenez, J. L. Direct Measurements of Gas/Particle Partitioning and Mass Accommodation Coefficients in Environmental Chambers. *Environ. Sci. Technol.* **2017**, *51* (20), 11867–11875.
- (17) Krechmer, J.; Lopez-Hilfiker, F.; Koss, A.; Hutterli, M.; Stoerner, C.; Deming, B.; Kimmel, J.; Warneke, C.; Holzinger, R.; Jayne, J.; Worsnop, D.; Fuhrer, K.; Gonin, M.; de Gouw, J. Evaluation of a New Reagent-Ion Source and Focusing Ion–Molecule Reactor for Use in Proton-Transfer-Reaction Mass Spectrometry. *Anal. Chem.* **2018**, *90* (20), 12011–12018.
- (18) Nazaroff, W. W. Residential Air-Change Rates: A Critical Review. *Indoor Air* **2021**, *31* (2), 282–313.
- (19) Keller-Rudek, H.; Moortgat, G. K.; Sander, R.; Sørensen, R. *The MPI-Mainz UV/VIS Spectral Atlas of Gaseous Molecules of Atmospheric Interest*. [http://satellite.mpic.de/spectral\\_atlas](http://satellite.mpic.de/spectral_atlas) (accessed 2022-02-10).
- (20) Peng, Z.; Jimenez, J. L. KinSim: A Research-Grade, User-Friendly, Visual Kinetics Simulator for Chemical-Kinetics and Environmental-Chemistry Teaching. *J. Chem. Educ.* **2019**, *96* (4), 806–811.
- (21) Blatchley, E. R.; Brenner, D. J.; Claus, H.; Cowan, T. E.; Linden, K. G.; Liu, Y.; Mao, T.; Park, S.-J.; Piper, P. J.; Simons, R. M.; Sliney, D. H. Far UV-C Radiation: An Emerging Tool for Pandemic Control. *Crit. Rev. Environ. Sci. Technol.* **2023**, *53* (6), 733–753.
- (22) Ma, B.; Burke-Bevis, S.; Tiefel, L.; Rosen, J.; Feeney, B.; Linden, K. G. Reflection of UVC Wavelengths from Common Materials during Surface UV Disinfection: Assessment of Human UV Exposure and Ozone Generation. *Sci. Total Environ.* **2023**, 161848.
- (23) Turner, M. C.; Jerrett, M.; Pope, C. A., 3rd; Krewski, D.; Gapstur, S. M.; Diver, W. R.; Beckerman, B. S.; Marshall, J. D.; Su, J.; Crouse, D. L.; Burnett, R. T. Long-Term Ozone Exposure and Mortality in a Large Prospective Study. *Am. J. Respir. Crit. Care Med.* **2016**, *193* (10), 1134–1142.
- (24) Bell, M. L.; Peng, R. D.; Dominici, F. The Exposure–response Curve for Ozone and Risk of Mortality and the Adequacy of Current Ozone Regulations. *Environ. Health Perspect.* **2006**, *114* (4), 532–536.
- (25) Weichenthal, S.; Pinault, L.; Christidis, T.; Burnett, R. T.; Brook, J. R.; Chu, Y.; Crouse, D. L.; Erickson, A. C.; Hystad, P.; Li, C.; Martin, R. V.; Meng, J.; Pappin, A. J.; Tjepkema, M.; van Donkelaar, A.; Weagle, C. L.; Brauer, M. How Low Can You Go? Air Pollution Affects Mortality at Very Low Levels. *Sci Adv* **2022**, *8* (39), eabo3381.
- (26) Ma, B.; Gundy, P. M.; Gerba, C. P.; Sobsey, M. D.; Linden, K. G. UV Inactivation of SARS-CoV-2 across the UVC Spectrum: KrCl\* Excimer, Mercury-Vapor, and Light-Emitting-Diode (LED) Sources. *Appl. Environ. Microbiol.* **2021**, *87* (22), e0153221.
- (27) Welch, D.; Buonanno, M.; Buchan, A. G.; Yang, L.; Atkinson, K. D.; Shuryak, I.; Brenner, D. J. Inactivation Rates for Airborne Human Coronavirus by Low Doses of 222 Nm Far-UVC Radiation. *Viruses* **2022**, *14* (4). <https://doi.org/10.3390/v14040684>.
